# Supplementary material for: Doping dependent dual-response mechanoluminescence in ZnGa2O4
Source: Royal Society of Chemistry journal article supplement (doi:10.1039/d2tc05086b), 2023-01-01
Supplement: d2tc05086b2.pdf [file d2tc05086b2.pdf]

Electronic Supplementary Material (ESI) for Journal of Materials

Chemistry C.

## Doping dependent dual-response mechanoluminescence in $\text{ZnGa}_2\text{O}_4$

Xiaowei Zheng<sup>ab</sup>, Yao Cheng<sup>\*ac</sup>, Yan Gao<sup>d</sup>, Tao Hu<sup>d</sup>, Ju Xu<sup>ac</sup>, Hang Lin<sup>ac</sup>, Yuansheng Wang<sup>\*ac</sup>

<sup>a</sup> Key Laboratory of Optoelectronic Materials Chemistry and Physics, Fujian Institute of Research on the Structure of Matter, Chinese Academy of Sciences, Fuzhou, Fujian, 350002, P.R. China.

<sup>b</sup> University of Chinese Academy of Sciences, Beijing, 100049, P.R. China

<sup>c</sup> Fujian Science & Technology Innovation Laboratory for Optoelectronic Information of China, Fuzhou, Fujian, 350108, P.R. China

<sup>d</sup> School of Applied Physics and Materials, Wuyi University, Jiangmen 529020, Guangdong Province, P. R. China

---

\* E-mail: chengyao@fjirsm.ac.cn; Tel/Fax: +86-591-63179423

## Electronic Supplementary Information

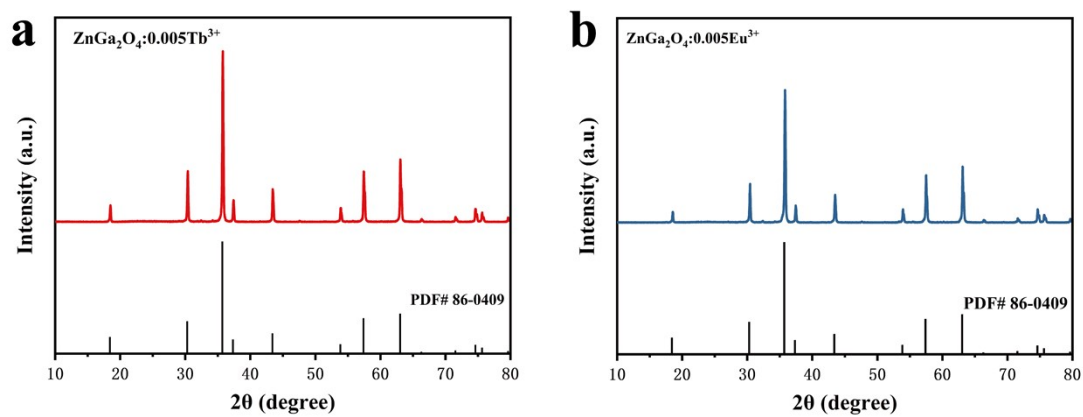

Figure S1. The XRD patterns of ZGO:Tb<sup>3+</sup> (a) and ZGO:Eu<sup>3+</sup> (b).

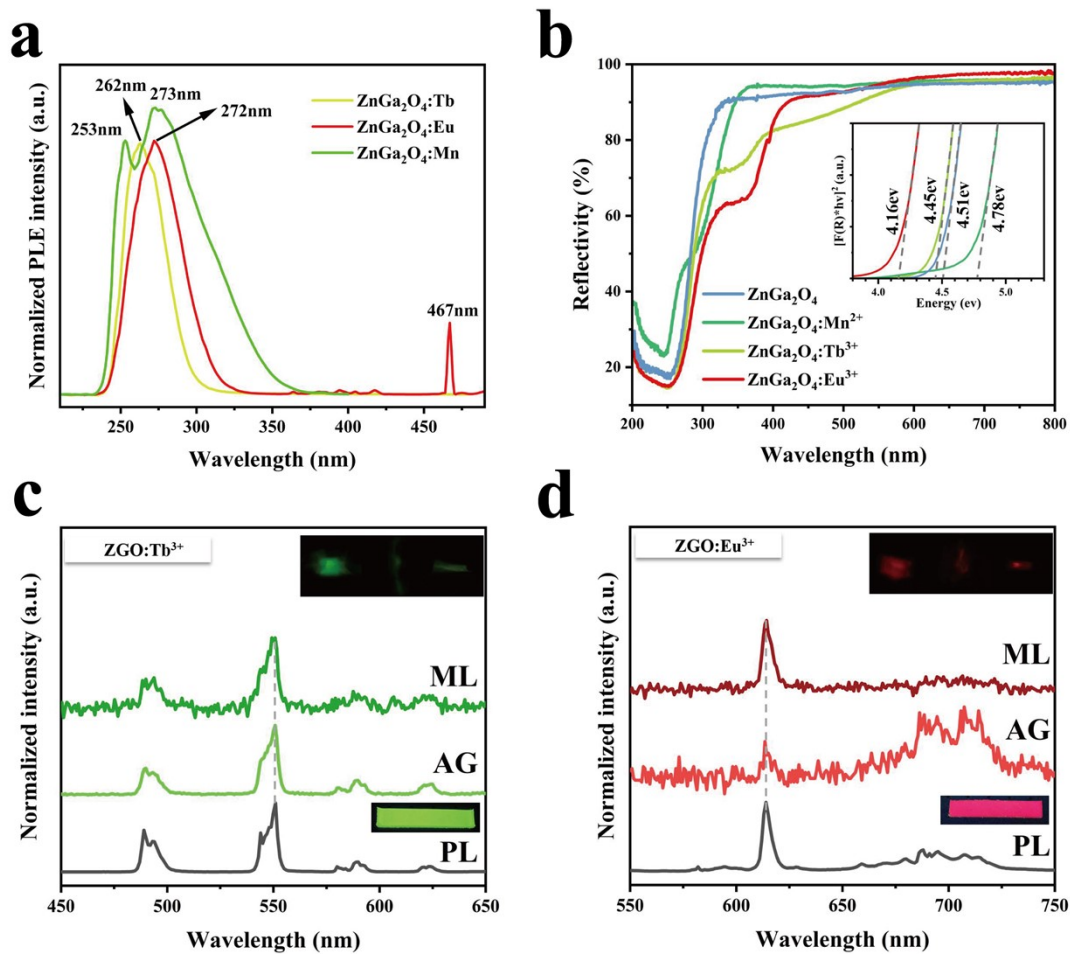

Figure S2. (a) PLE and (b) UV-Vis DRS of ZnGa<sub>2</sub>O<sub>4</sub> host and ZGO:M (M=Mn, Tb and Eu), the comparison of their excitation spectra ( $\lambda_{em}$  = maximum emission wavelength). The ML, AG and PL spectra of (c) ZGO:Tb<sup>3+</sup> and (d) ZGO:Eu<sup>3+</sup>.

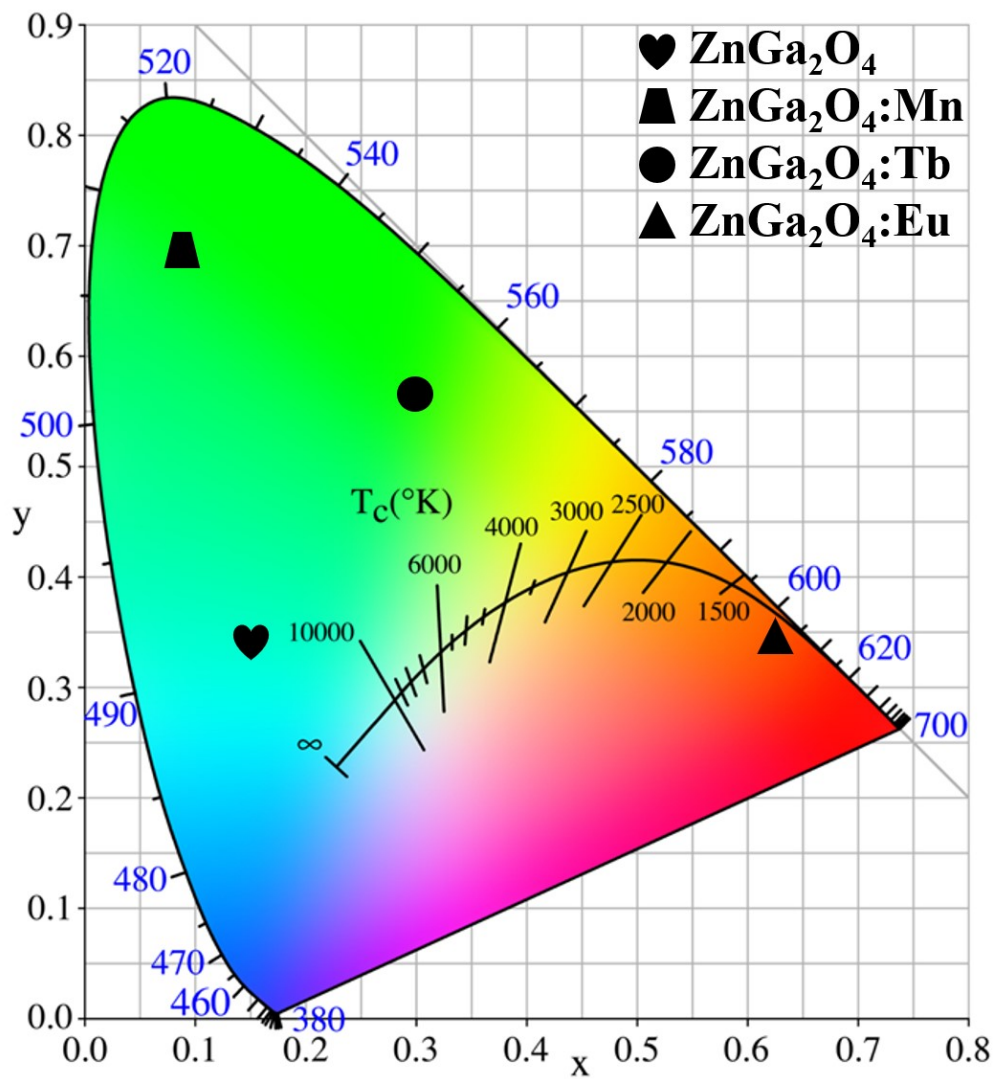

Figure S3. CIE coordinates of the ML composites

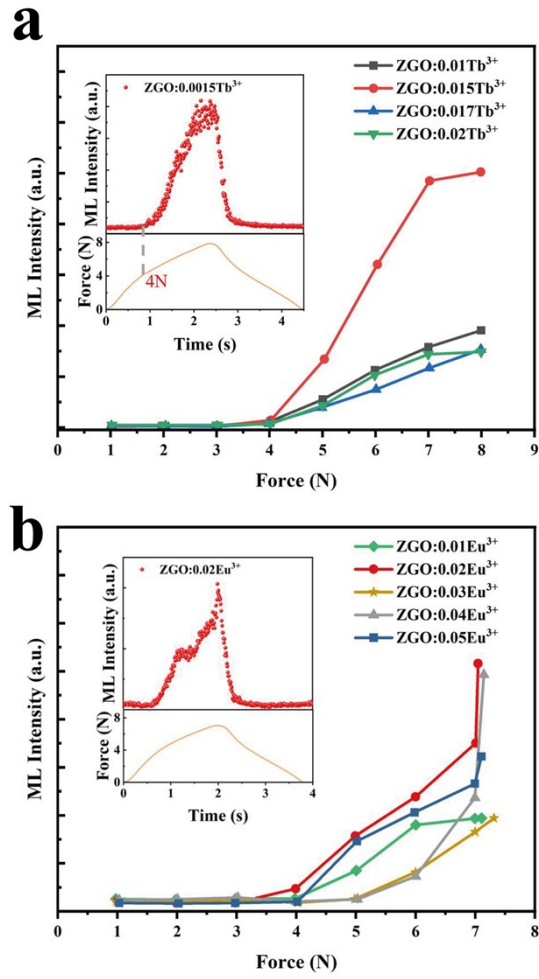

Figure S4. The integral ML intensity versus the tension force for the composite film of (a) ZGO:Tb/PDMS and (b) ZGO:Eu/PDMS.

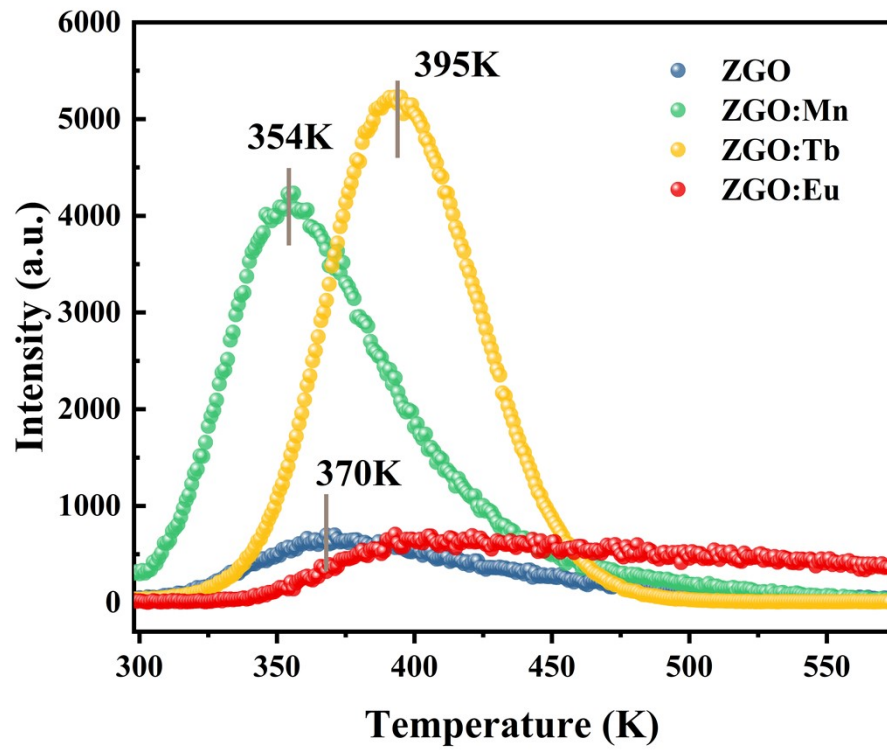

Figure S5. TL spectra of ZGO, ZGO:Mn, ZGO:Tb and ZGO:Eu before stretching

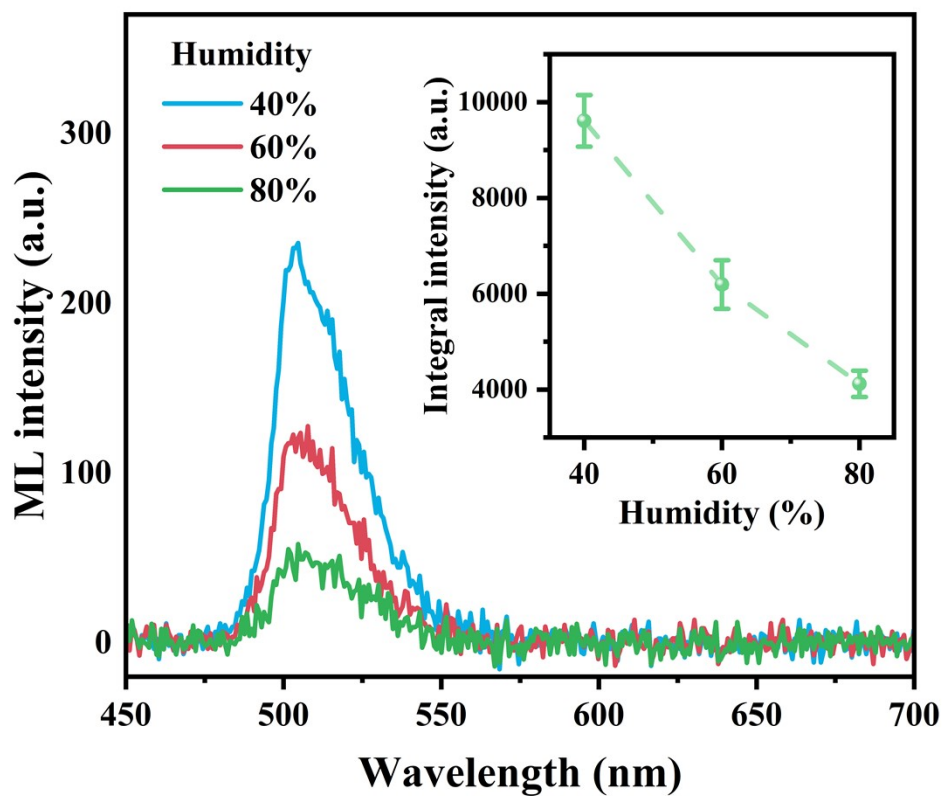

Figure S6. ML spectra of ZGO:Mn/PDMS under different humidity.
